# Supplementary material for: Quantitative Ultrasound Radiofrequency Data Analysis for the Assessment of Hepatic Steatosis in Nonalcoholic Fatty Liver Disease Using Magnetic Resonance Imaging Proton Density Fat Fraction as the Reference Standard
Source: PubMed Central journal article supplement — Korean J Radiol. 2021 Mar 9;22(7):1077–86. doi: 10.3348/kjr.2020.1262 (PMC8236371; doi:10.3348/kjr.2020.1262), 2021-03-09
Supplement: kjr-22-1077-s002.pdf [file kjr-22-1077-s002.pdf]

## Supplementary Material 2

### Detailed Imaging Parameters of MR Elastography

MR elastography (MRE) was performed using a 2-dimensional gradient-echo sequence with the following imaging parameters: repetition time/echo time = 50/20.9 ms, slice thickness = 6 mm, number of slices = 1, flip angle = 24, field-of-view = 380 x 308 mm<sup>2</sup>, matrix = 128 x 73, number of excitations = 1, parallel imaging factor = 2, and one motion encoding gradient direction (craniocaudal) with four-phase offsets. Four consecutive MRE slices were obtained during four consecutive breath-holds at the end of expiration. After the acquisition, the wave images were automatically generated by the MR scanner, and the images of tissue stiffness (elastograms, in kPa) were obtained. Additionally, the scanner software also provided confidence maps with a 95% confidence threshold to exclude areas with significant errors caused by artifacts such as significant wave interference of oblique wave propagation.

### REFERENCES

1. Kim H, Varghese T. Attenuation estimation using spectral cross-correlation. *IEEE Trans Ultrason Ferroelectr Freq Control* 2007;54:510-519
2. Liao YY, Yang KC, Lee MJ, Huang KC, Chen JD, Yeh CK. Multifeature analysis of an ultrasound quantitative diagnostic index for classifying nonalcoholic fatty liver disease. *Sci Rep* 2016;6:35083
3. Mohana Shankar P. A general statistical model for ultrasonic backscattering from tissues. *IEEE Trans Ultrason Ferroelectr Freq Control* 2000;47:727-736
4. Ho MC, Lee YH, Jeng YM, Chen CN, Chang KJ, Tsui PH. Relationship between ultrasound backscattered statistics and the concentration of fatty droplets in livers: an animal study. *PLoS One* 2013;8:e63543
